# Supplementary material for: Cytotoxicity-Guided Isolation of Two New Phenolic Derivatives from Dryopteris fragrans (L.) Schott
Source: MDPI journal article supplement (doi:10.3390/molecules23071652), 2018-07-06
Supplement: s1 [file s1]

## Supplementary material

# Cytotoxicity-guided isolation of two new phenolic derivatives from *Dryopteris fragrans* (L.) Schott

Tong Zhang <sup>1</sup>, Li Wang <sup>2</sup>, De-Hua Duan <sup>1</sup>, Yi-Hao Zhang <sup>1</sup>, Sheng-Xiong Huang <sup>2,\*</sup> and Ying Chang <sup>1,\*</sup>

<sup>1</sup> College of Life Science, Northeast Agricultural University, Harbin 150030, China; [shmzhyzt@163.com](mailto:shmzhyzt@163.com) (T.Z.); [myrddh@163.com](mailto:myrddh@163.com) (D.-H.D.); [yhzneau@163.com](mailto:yhzneau@163.com) (Y.-H.Z.)

<sup>2</sup> State Key Laboratory of Phytochemistry and Plant Resources in West China, Kunming Institute of Botany, Chinese Academy of Sciences, Kunming 650201, China; [jasminewangli@126.com](mailto:jasminewangli@126.com) (L.W.)

\* Correspondence: [sxhuang@mail.kib.ac.cn](mailto:sxhuang@mail.kib.ac.cn) (S.-X.H.); [changying@neau.edu.cn](mailto:changying@neau.edu.cn) (C.Y.); Tel.: +86-871-6521-5112 (S.-X.H.); +86-451-5519-0410 (C.Y.)

### Contents of Supporting Information

| No. | Contents                                                                                                                    | Page  |
|-----|-----------------------------------------------------------------------------------------------------------------------------|-------|
| 1   | Figure S1. The first round screening of cytotoxic sites of crude extract from <i>Dryopteris fragrans</i> .                  | 3     |
| 2.  | Figure S2. The second round screening of cytotoxic sites of fractions from <i>Dryopteris fragrans</i> .                     | 3-4   |
| 3.  | Figure S3. <sup>1</sup> H NMR spectrum of compound <b>1</b> recorded in CDCl <sub>3</sub> at 600 MHz.                       | 5     |
| 4.  | Figure S4. <sup>13</sup> C NMR spectrum of compound <b>1</b> recorded in CDCl <sub>3</sub> at 150 MHz.                      | 5     |
| 5.  | Figure S5. HSQC spectrum of compound <b>1</b> recorded in CDCl <sub>3</sub> at 600 MHz.                                     | 6     |
| 6.  | Figure S6. HMBC spectrum of compound <b>1</b> recorded in CDCl <sub>3</sub> at 600 MHz.                                     | 6     |
| 7   | Figure S7. UV spectrum of compound <b>1</b> .                                                                               | 7     |
| 8   | Figure S8. HR-ESI-MS spectrum of compound <b>1</b> .                                                                        | 8     |
| 9   | Figure S9. CD spectrum of compound <b>1</b> .                                                                               | 9     |
| 10  | Figure S10. IR spectrum of compound <b>1</b> .                                                                              | 9     |
| 11  | Figure S11. <sup>1</sup> H NMR spectrum of the mixture ( <b>2</b> and <b>3</b> ) recorded in CDCl <sub>3</sub> at 400 MHz.  | 10    |
| 12  | Figure S12. <sup>13</sup> C NMR spectrum of the mixture ( <b>2</b> and <b>3</b> ) recorded in CDCl <sub>3</sub> at 100 MHz. | 10    |
| 13  | Figure S13. ESI-MS spectrum of the mixture ( <b>2</b> and <b>3</b> ).                                                       | 11    |
| 14  | Figure S14. <sup>1</sup> H NMR spectrum of compound <b>2a</b> recorded in CDCl <sub>3</sub> at 400 MHz.                     | 11    |
| 15  | Figure S15. <sup>13</sup> C NMR spectrum of compound <b>2a</b> recorded in CDCl <sub>3</sub> at 100 MHz.                    | 12    |
| 16  | Figure S16. <sup>1</sup> H NMR spectrum of compound <b>2</b> recorded in CDCl <sub>3</sub> at 600 MHz.                      | 12    |
| 17  | Figure S17. <sup>13</sup> C NMR spectrum of compound <b>2</b> recorded in CDCl <sub>3</sub> at 150 MHz.                     | 13    |
| 18  | Figure S18. HSQC spectrum of compound <b>2</b> recorded in CDCl <sub>3</sub> at 600 MHz.                                    | 13    |
| 19  | Figure S19. HMBC spectrum of compound <b>2</b> recorded in CDCl <sub>3</sub> at 600 MHz.                                    | 14    |
| 20  | Figure S20. <sup>1</sup> H- <sup>1</sup> H COSY spectrum of compound <b>2</b> recorded in CDCl <sub>3</sub> at 600 MHz.     | 14    |
| 21  | Figure S21. UV spectrum of compound <b>2</b> .                                                                              | 15    |
| 22  | Figure S22. HR-ESI-MS spectrum of compound <b>2</b> .                                                                       | 16    |
| 23  | Figure S23. IR spectrum of compound <b>2</b> .                                                                              | 17    |
| 24  | Figure S24. <sup>1</sup> H NMR spectrum of compound <b>3a</b> recorded in CDCl <sub>3</sub> at 400 MHz.                     | 17    |
| 25  | Figure S25. <sup>13</sup> C NMR spectrum of compound <b>3a</b> recorded in CDCl <sub>3</sub> at 100 MHz.                    | 18    |
| 26  | Figure S26. <sup>1</sup> H NMR spectrum of compound <b>3</b> recorded in CDCl <sub>3</sub> at 600 MHz.                      | 18    |
| 27  | Figure S27. <sup>13</sup> C NMR spectrum of compound <b>3</b> recorded in CDCl <sub>3</sub> at 150 MHz.                     | 19    |
| 28  | <sup>1</sup> H NMR and <sup>13</sup> C NMR spectral data of compounds <b>4-8</b> .                                          | 19-20 |

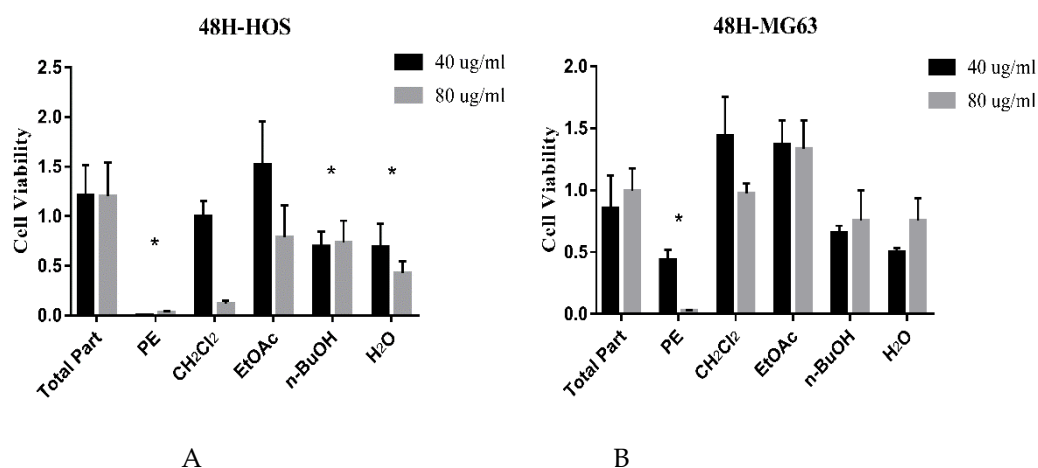

Figure S1. The first round screening of cytotoxic sites of crude extract from *Dryopteris fragrans*. A) against HOS cell line, B) against MG63 cell line. The asterisk indicated that there were significant differences ( $p < 0.05$ ) between other crude extract and the total part. Each value represented the means  $\pm$ SD of six independent experiments.

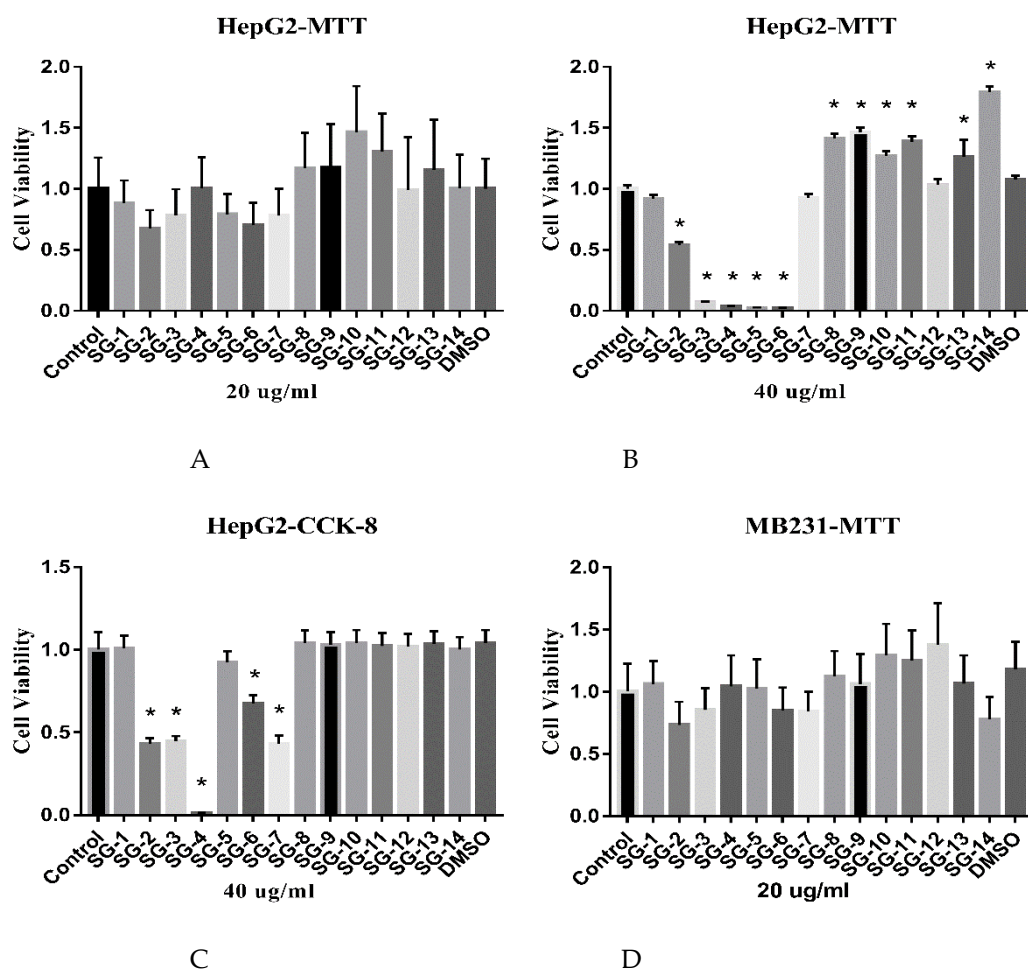

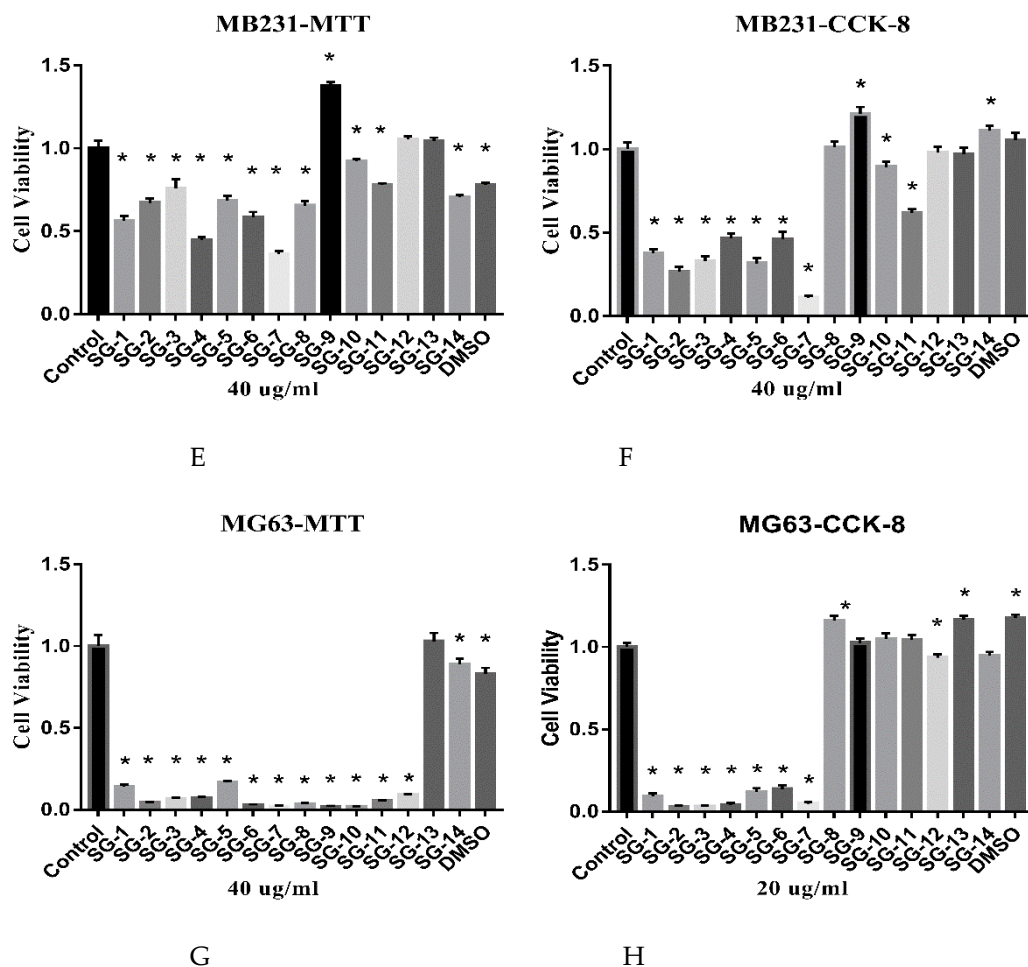

Figure S2. The second round screening of cytotoxic sites of fractions from *Dryopteris fragrans*. A) against HepG2 cell line in MTT assay at the concentration of 20  $\mu\text{g/mL}$ ; B) against HepG2 cell line in MTT assay at the concentration of 40  $\mu\text{g/mL}$ ; C) against HepG2 cell line in CCK-8 assay at the concentration of 40  $\mu\text{g/mL}$ ; D) against MB231 cell line in MTT assay at the concentration of 20  $\mu\text{g/mL}$ ; E) against MB231 cell line in MTT assay at the concentration of 40  $\mu\text{g/mL}$ ; F) against MB231 cell line in CCK-8 assay at the concentration of 40  $\mu\text{g/mL}$ ; G) against MG63 cell line in MTT assay at the concentration of 40  $\mu\text{g/mL}$ ; H) against MG63 cell line in CCK-8 assay at the concentration of 20  $\mu\text{g/mL}$ . The asterisk indicates that there were significant differences ( $p < 0.05$ ) between other fractions and the control group. Each value represented the means  $\pm$ SD of six independent experiments.

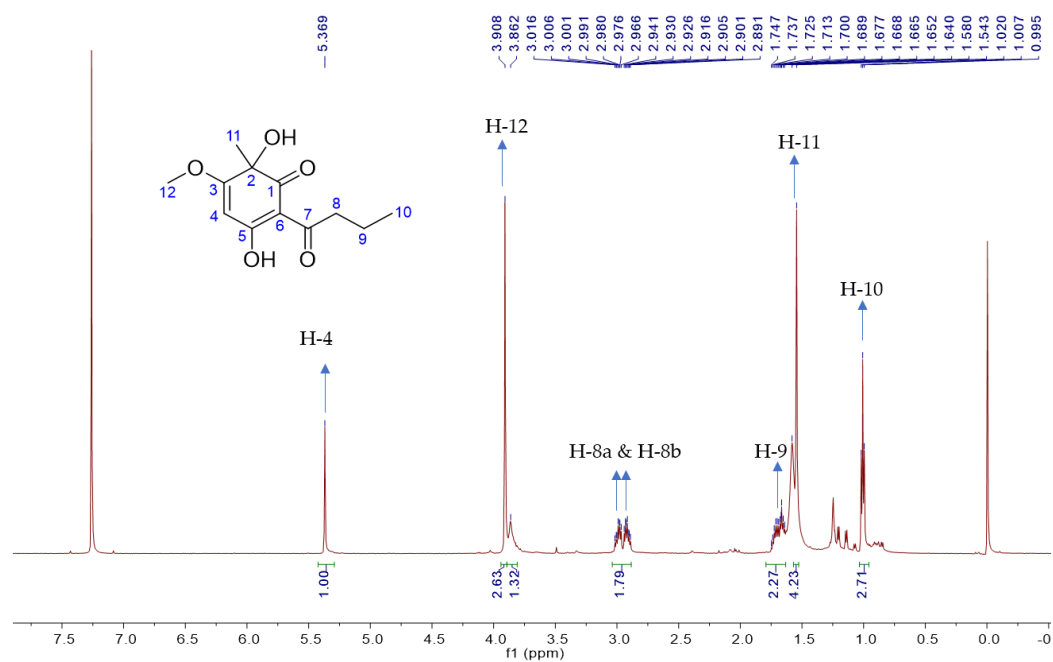

Figure S3.  $^1\text{H}$ -NMR spectrum of compound **1** recorded in  $\text{CDCl}_3$  at 600 MHz.

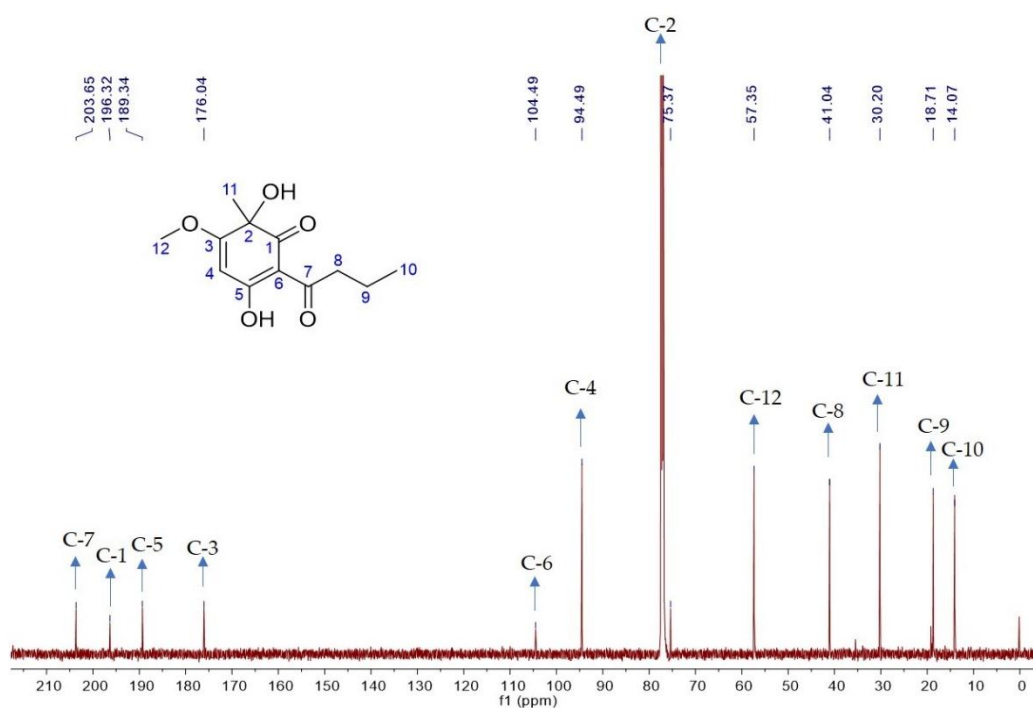

Figure S4.  $^{13}\text{C}$ -NMR spectrum of compound **1** recorded in  $\text{CDCl}_3$  at 150 MHz.

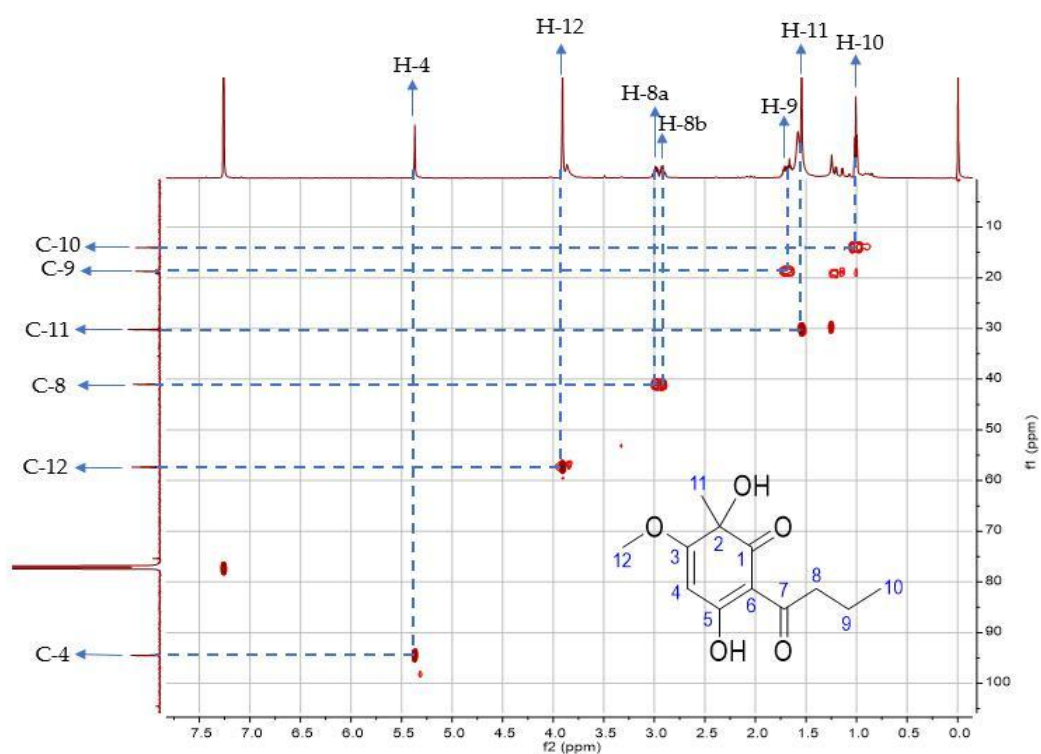

Figure S5. HSQC spectrum of compound **1** recorded in CDCl<sub>3</sub> at 600 MHz.

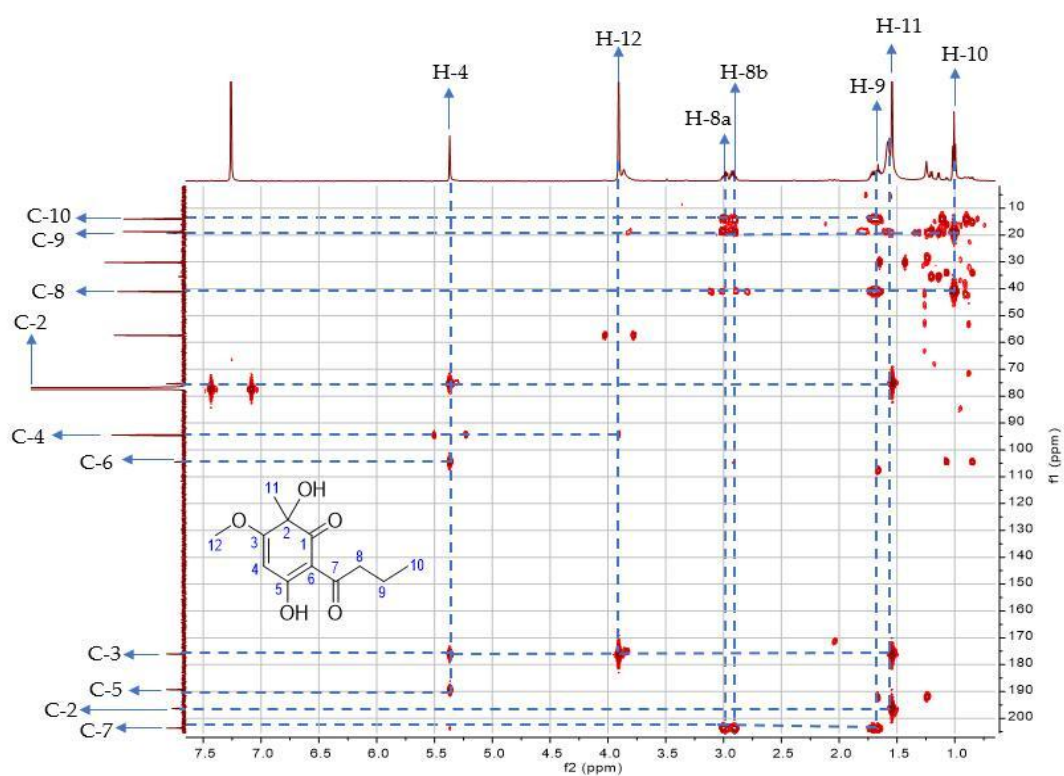

Figure S6. HMBC spectrum of compound **1** recorded in CDCl<sub>3</sub> at 600 MHz.

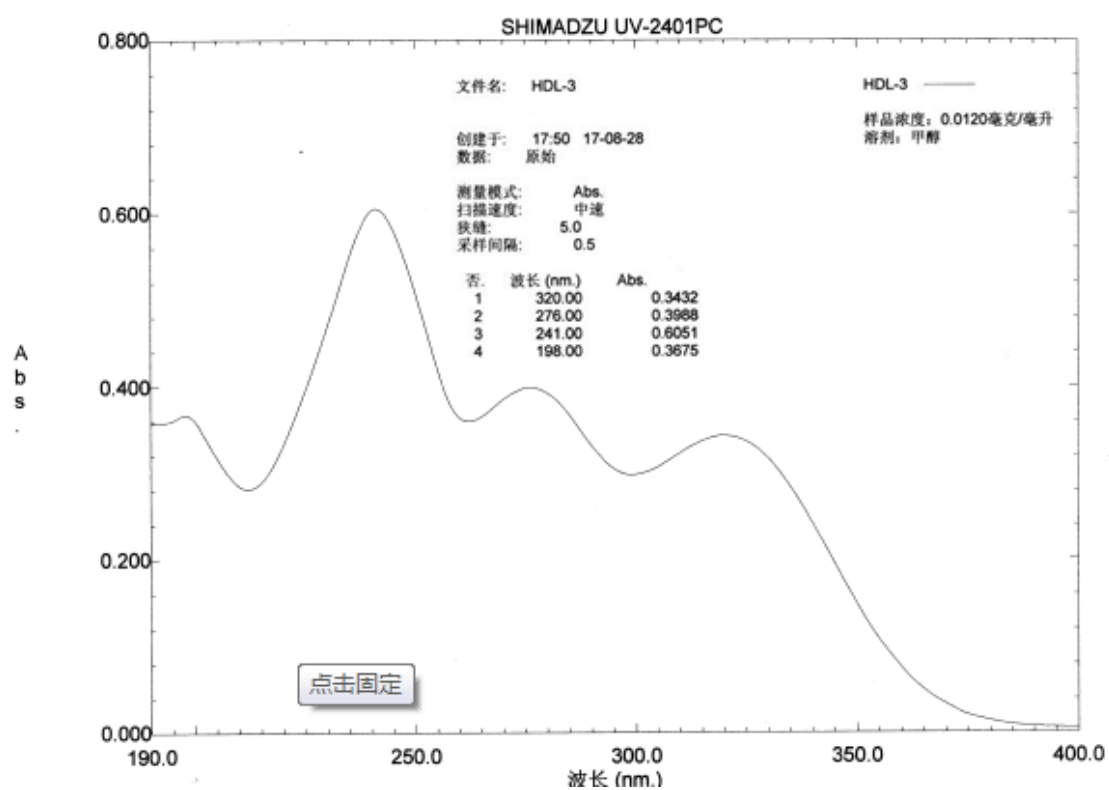

Figure S7. UV spectrum of compound 1.

Data File: E:\DATA\2017\0822\HDL-3.lcd

| Elmt | Val. | Min | Max | Elmt | Val. | Min | Max | Elmt | Val. | Min | Max | Elmt | Val. | Min | Max | Use Adduct |
|------|------|-----|-----|------|------|-----|-----|------|------|-----|-----|------|------|-----|-----|------------|
| H    | 1    | 0   | 150 | O    | 2    | 0   | 50  | P    | 3    | 0   | 0   | Br   | 1    | 0   | 0   | H          |
| B    | 3    | 0   | 0   | F    | 1    | 0   | 0   | S    | 2    | 0   | 0   | I    | 3    | 0   | 5   |            |
| C    | 4    | 0   | 100 | Na   | 1    | 0   | 0   | Cl   | 1    | 0   | 0   | Pt   | 2    | 0   | 5   |            |
| N    | 3    | 0   | 20  | Mg   | 2    | 0   | 0   | Fe   | 2    | 0   | 0   |      |      |     |     |            |

Error Margin (ppm): 10

HC Ratio: unlimited

Max Isotopes: all

MSn Iso RI (%): 75.00

DBE Range: -2.0 - 100.0

Apply N Rule: yes

Isotope RI (%): 1.00

MSn Logic Mode: AND

Electron Ions: both

Use MSn Info: yes

Isotope Res: 10000

Max Results: 10

Event#: 2 MS(E-) Ret. Time : 0.450 Scan#: 92

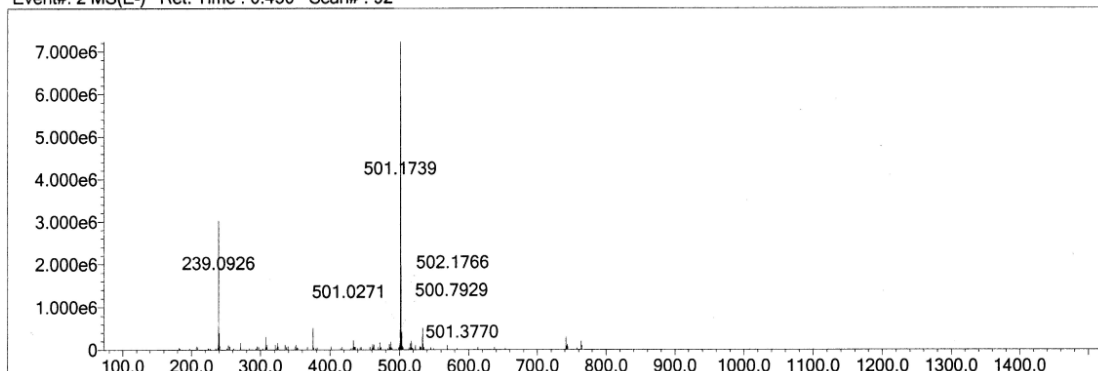

Measured region for 239.0926 m/z

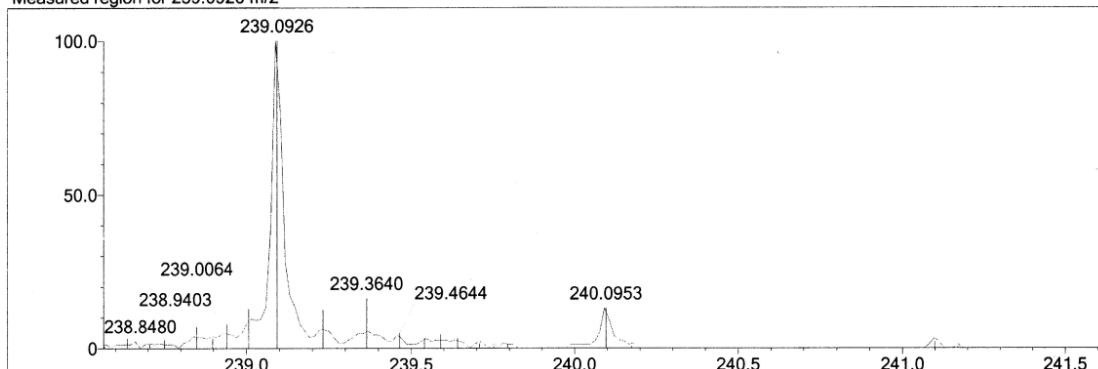

C12 H16 O5 [M-H]- : Predicted region for 239.0925 m/z

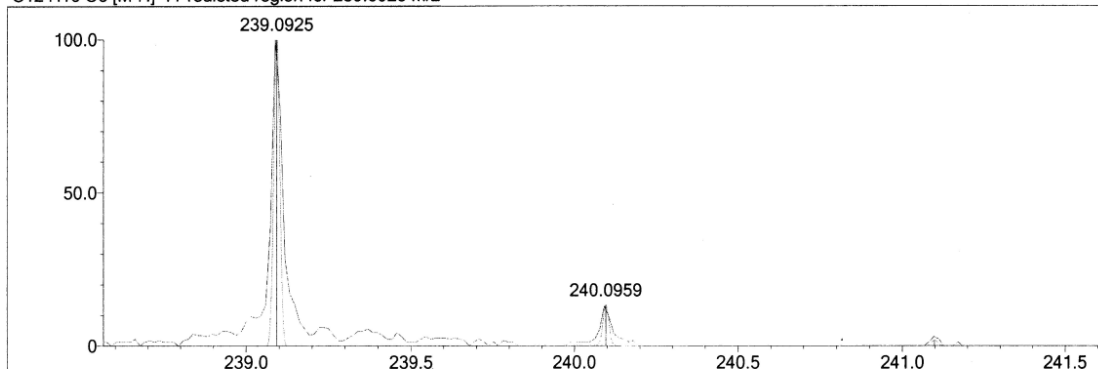

| Formula (M) | Ion    | Meas. m/z | Pred. m/z | Df. (mDa) | Df. (ppm) | DBE |
|-------------|--------|-----------|-----------|-----------|-----------|-----|
| C12 H16 O5  | [M-H]- | 239.0926  | 239.0925  | 0.1       | 0.42      | 5.0 |

Figure S8. HR-ESI-MS spectrum of compound 1



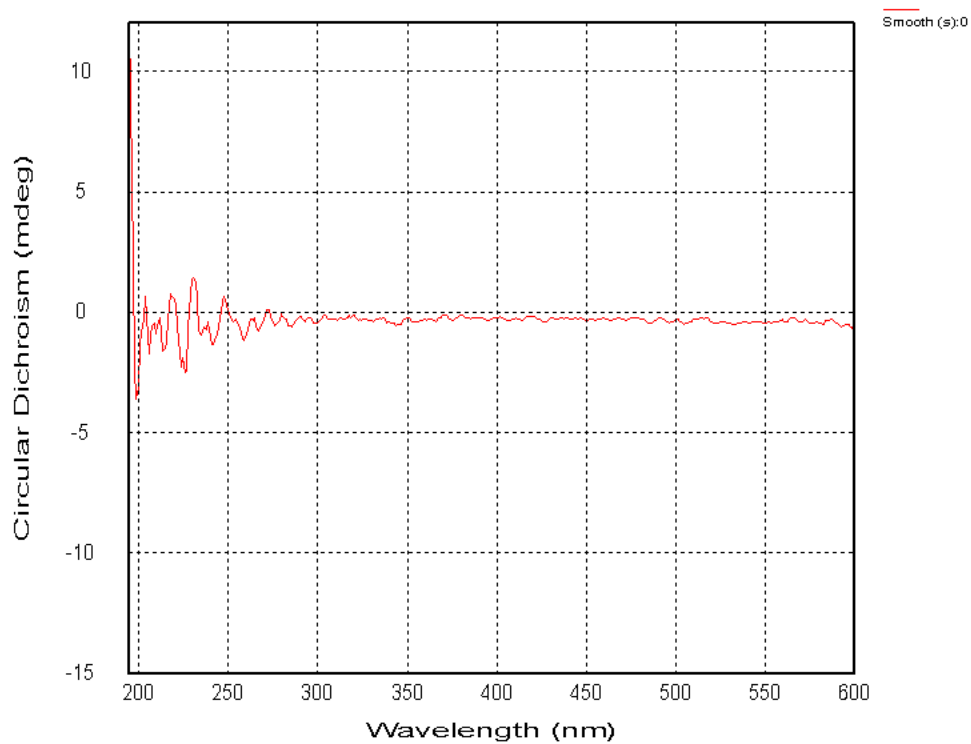

Figure S9. CD spectrum of compound **1**.

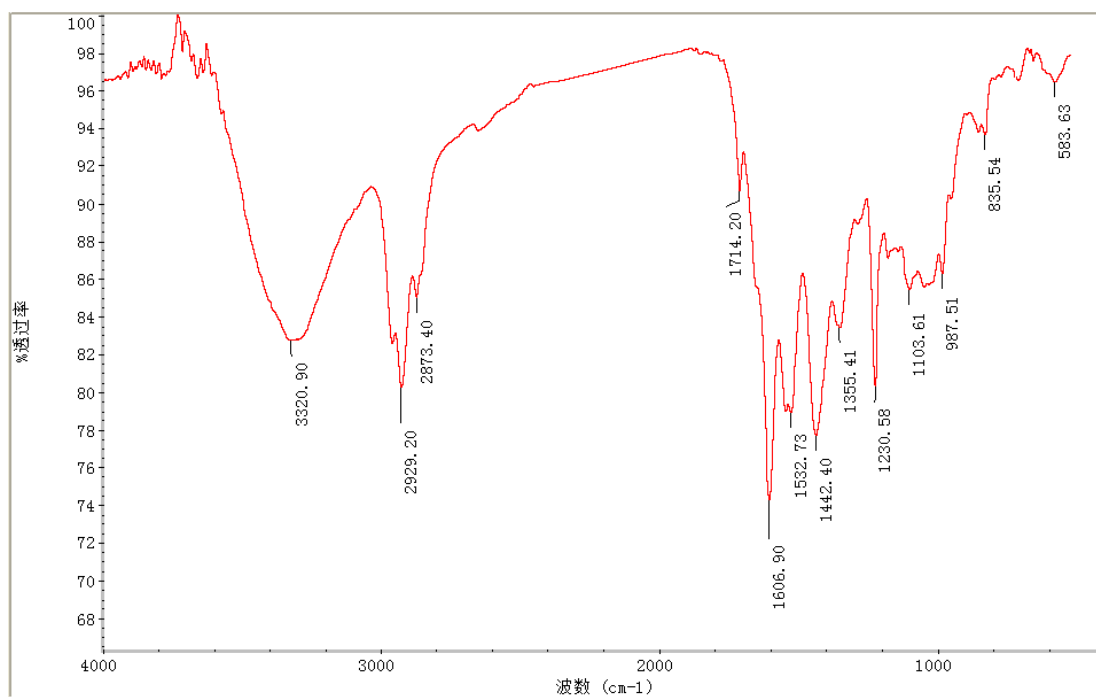

Figure S10. IR spectrum of compound **1**.

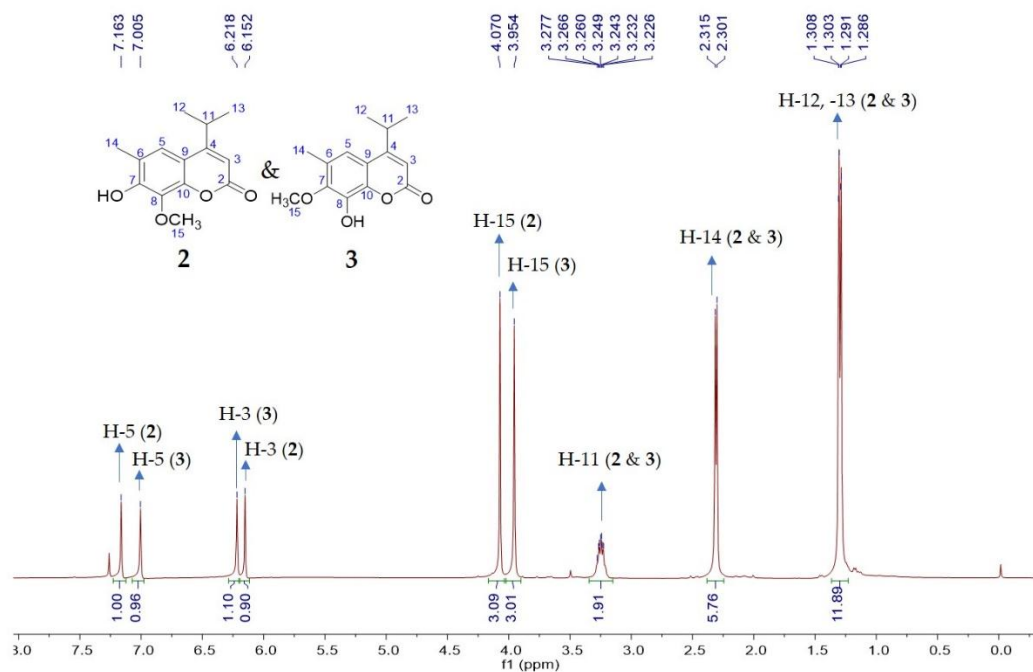

Figure S11.  $^1\text{H}$ -NMR spectrum of the mixture (2 and 3) recorded in  $\text{CDCl}_3$  at 400 MHz

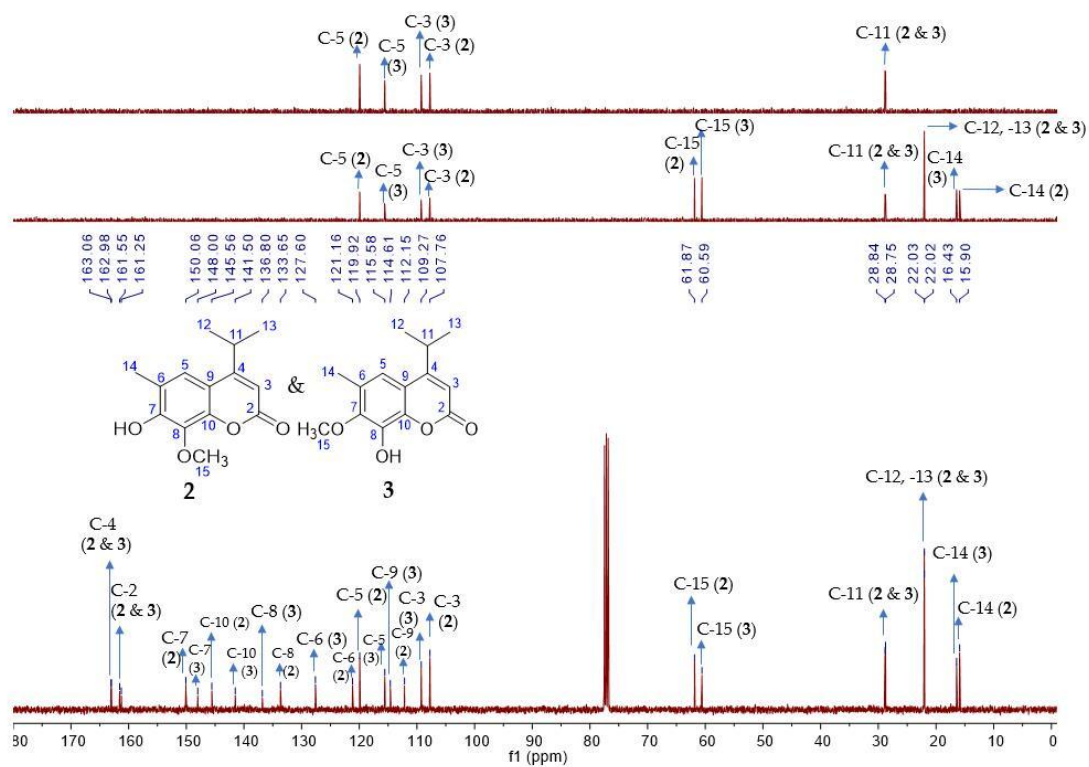

Figure S12.  $^{13}\text{C}$ -NMR spectrum of the mixture (2 and 3) recorded in  $\text{CDCl}_3$  at 100 MHz

| Sample Name   | HDL-1   | Position    | P1-B1  | Instrument Name | Instrument 1 | User Name              |                     |
|---------------|---------|-------------|--------|-----------------|--------------|------------------------|---------------------|
| Inj Vol       | 0.1     | InjPosition |        | SampleType      | Sample       | IRM Calibration Status | Success             |
| Data Filename | HDL-1.d | ACQ Method  | SIBU.m | Comment         |              | Acquired Time          | 6/2/2017 9:20:59 AM |

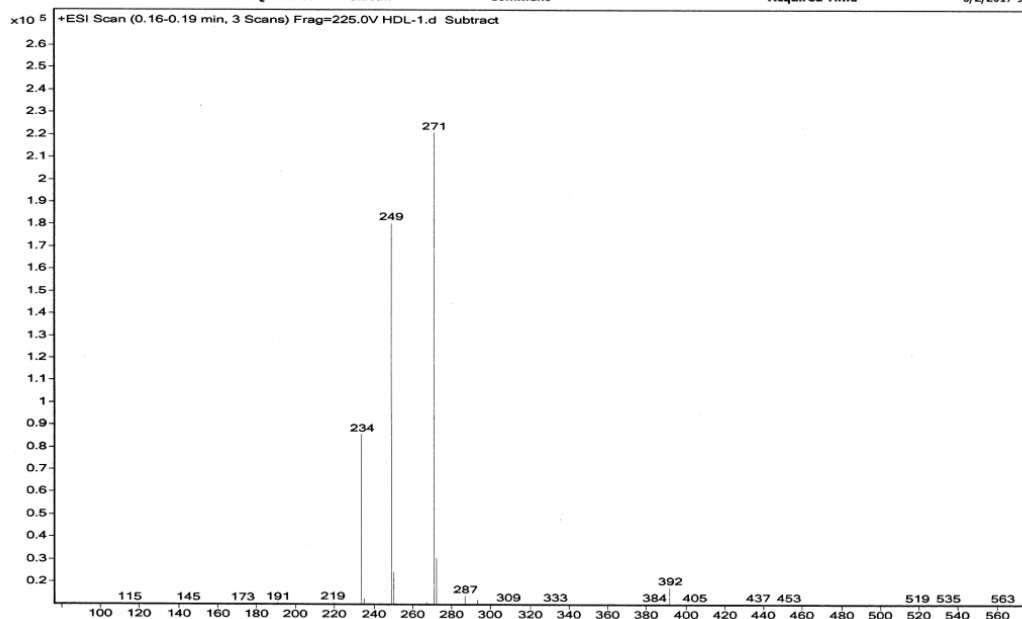

Figure S13. ESI-MS spectrum of the mixture (2 and 3).

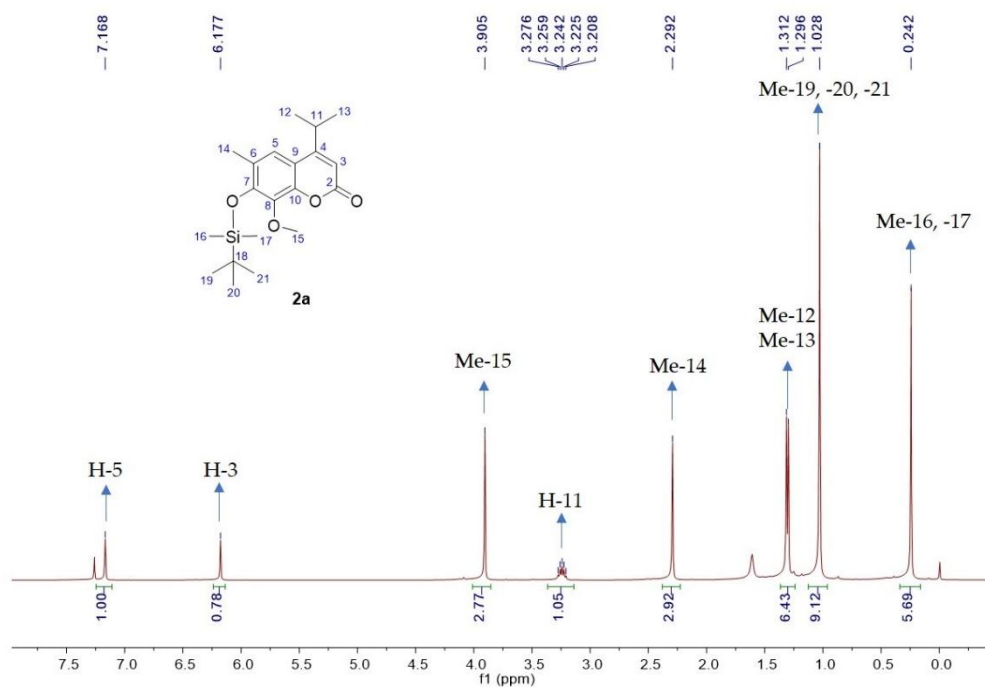

Figure S14.  $^1\text{H}$ -NMR spectrum of compound **2a** recorded in  $\text{CDCl}_3$  at 400 MHz.

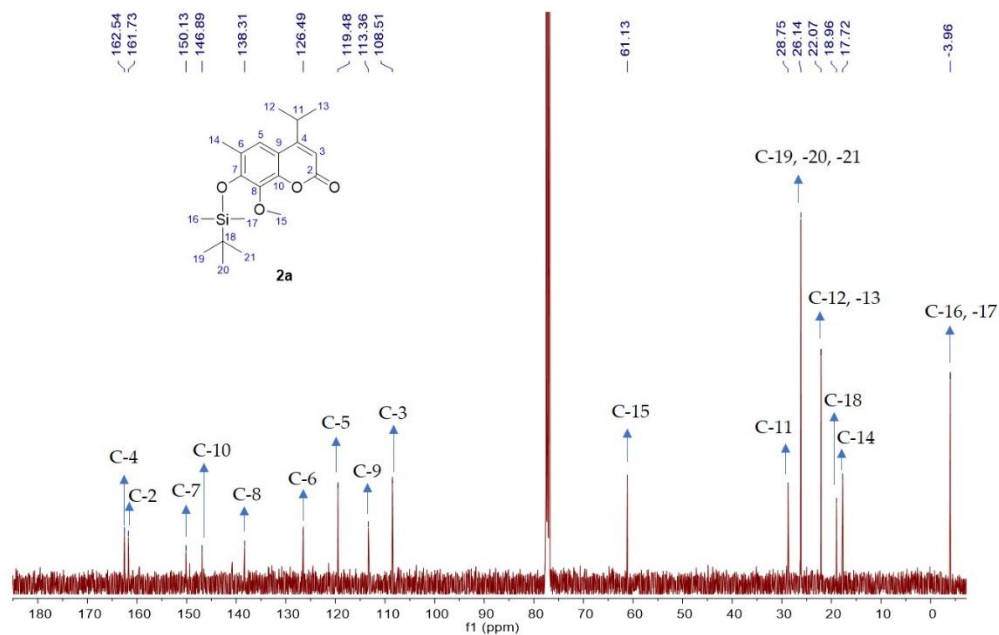

Figure S15.  $^{13}\text{C}$ -NMR spectrum of compound **2a** recorded in  $\text{CDCl}_3$  at 100 MHz.

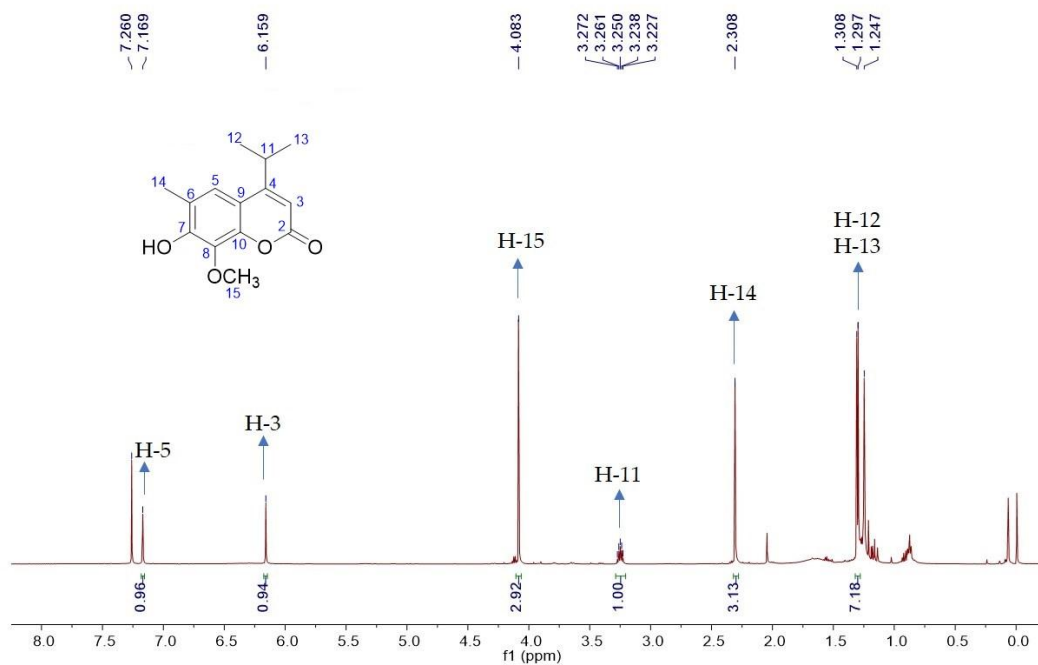

Figure S16.  $^1\text{H}$ -NMR spectrum of compound **2** recorded in  $\text{CDCl}_3$  at 600 MHz.

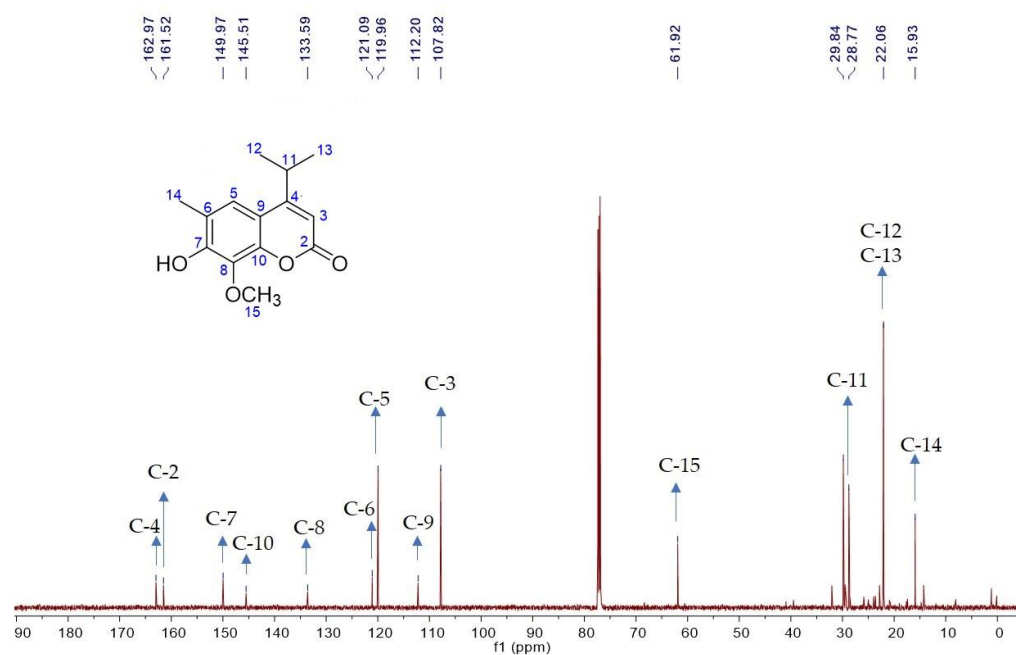

Figure S17.  $^{13}\text{C}$ -NMR spectrum of compound **2** recorded in  $\text{CDCl}_3$  at 150 MHz.

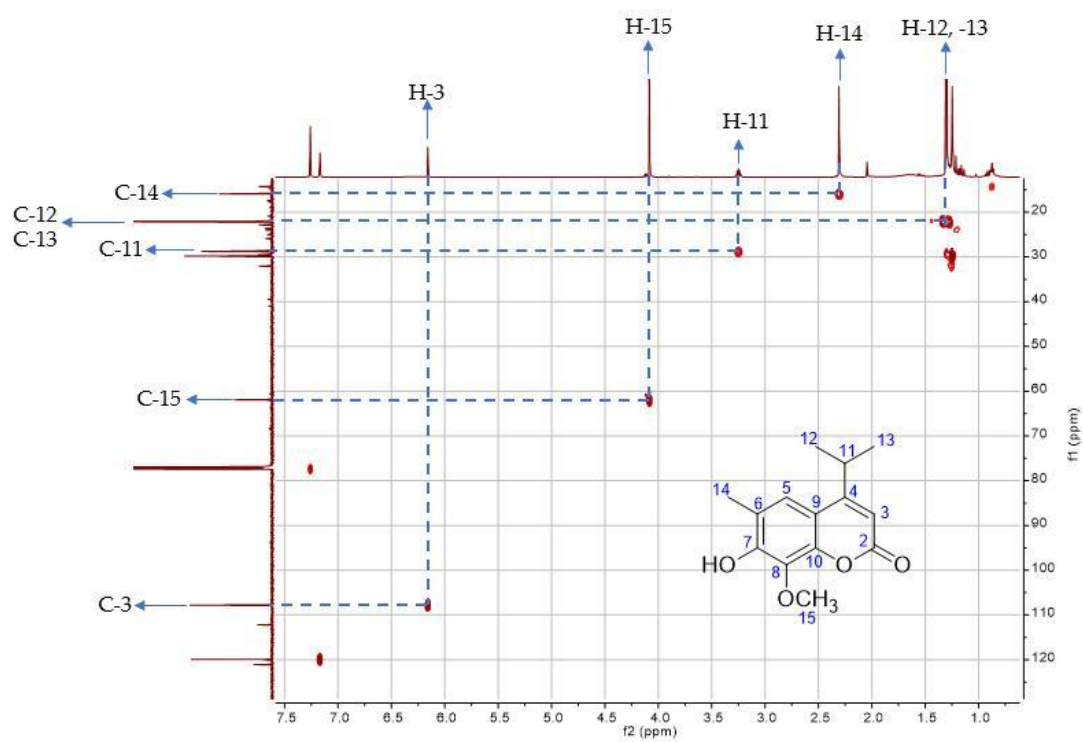

Figure S18. HSQC spectrum of compound **2** recorded in  $\text{CDCl}_3$  at 600 MHz.

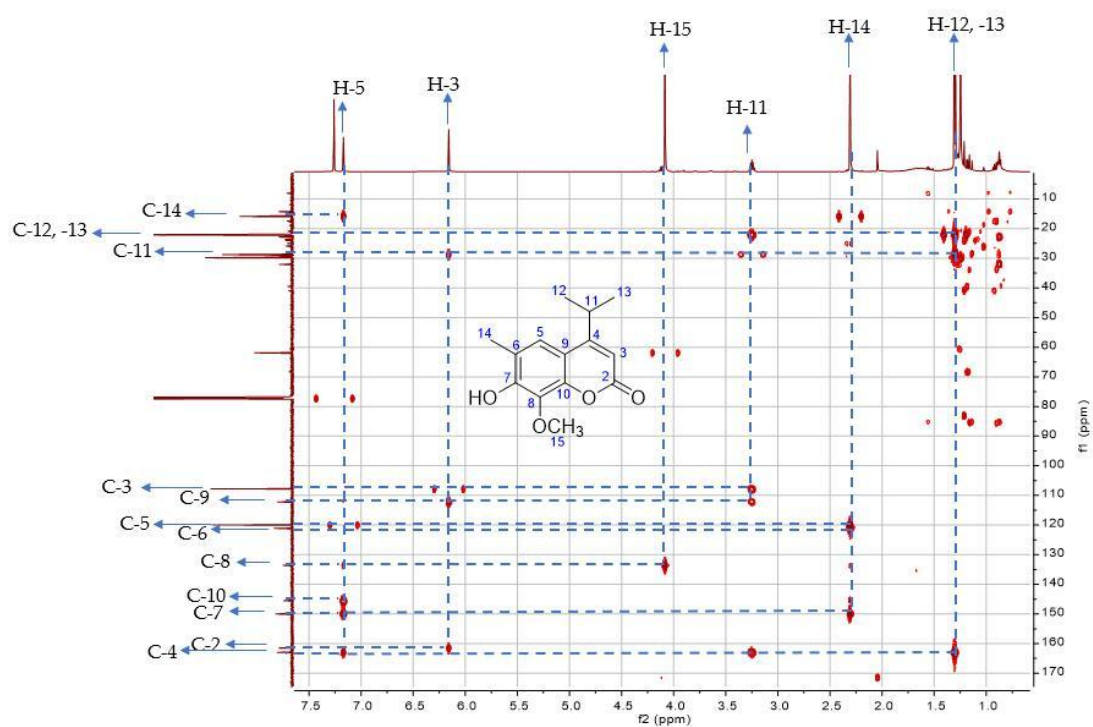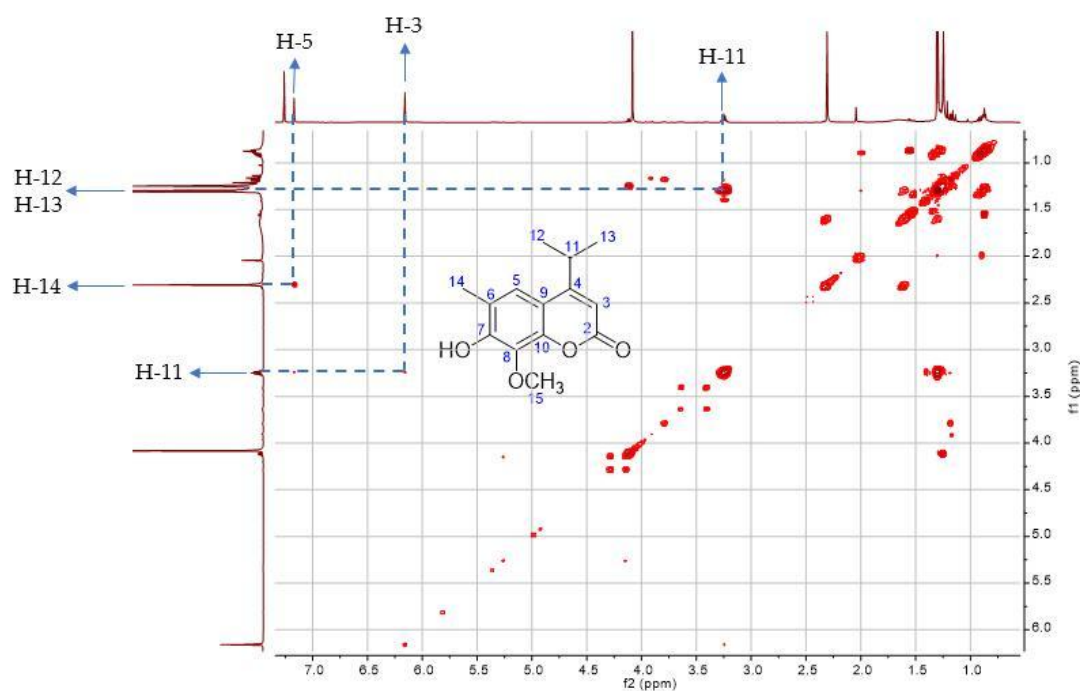

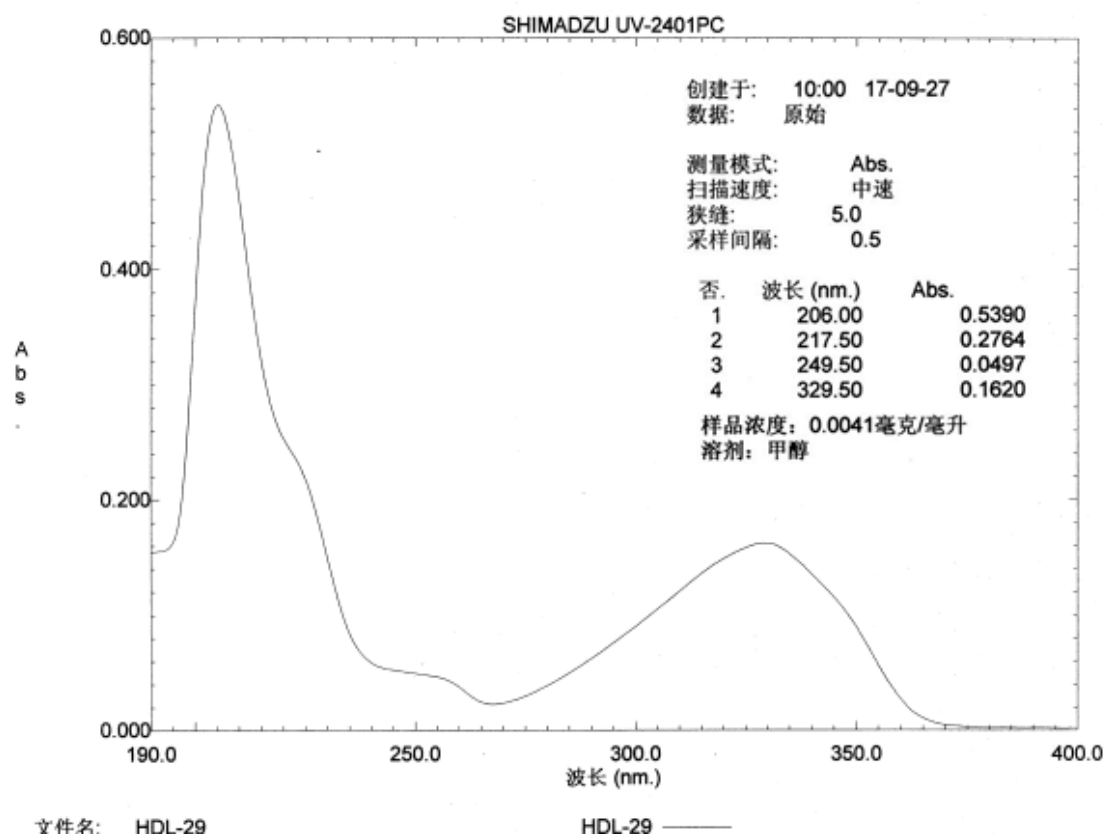

Figure S21. UV spectrum of compound 2.

Data File: E:\DATA\2017\0926\HDL-29.lcd

| Elmt | Val. | Min | Max | Elmt | Val. | Min | Max | Elmt | Val. | Min | Max | Elmt | Val. | Min | Max | Use Adduct |
|------|------|-----|-----|------|------|-----|-----|------|------|-----|-----|------|------|-----|-----|------------|
| H    | 1    | 0   | 100 | O    | 2    | 0   | 50  | P    | 3    | 0   | 0   | Br   | 1    | 0   | 0   | H          |
| B    | 3    | 0   | 0   | F    | 1    | 0   | 0   | S    | 2    | 0   | 5   | I    | 3    | 0   | 0   |            |
| C    | 4    | 0   | 100 | Na   | 1    | 0   | 0   | Cl   | 1    | 0   | 0   | Pt   | 2    | 0   | 0   |            |
| N    | 3    | 0   | 0   | Mg   | 2    | 0   | 0   | Fe   | 2    | 0   | 0   |      |      |     |     |            |

Error Margin (ppm): 10

HC Ratio: unlimited

Max Isotopes: all

MSn Iso RI (%): 75.00

DBE Range: -2.0 - 100.0

Apply N Rule: yes

Isotope RI (%): 1.00

MSn Logic Mode: AND

Electron Ions: both

Use MSn Info: yes

Isotope Res: 10000

Max Results: 10

Event#: 2 MS(E-) Ret. Time : 0.470 Scan#: 96

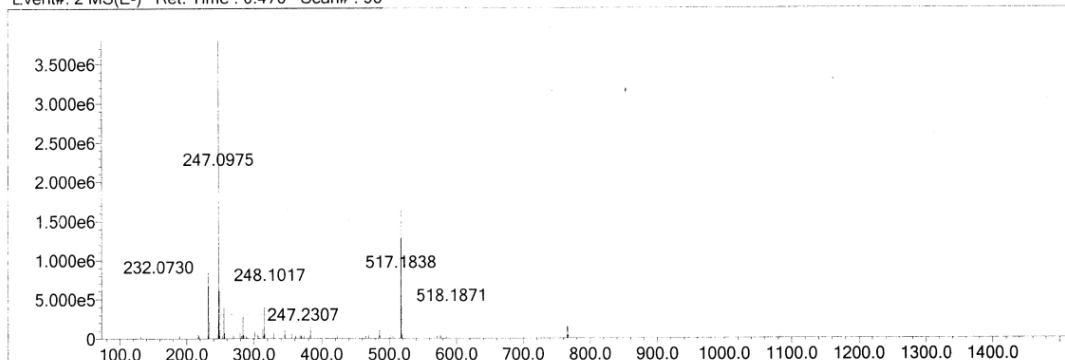

Measured region for 247.0975 m/z

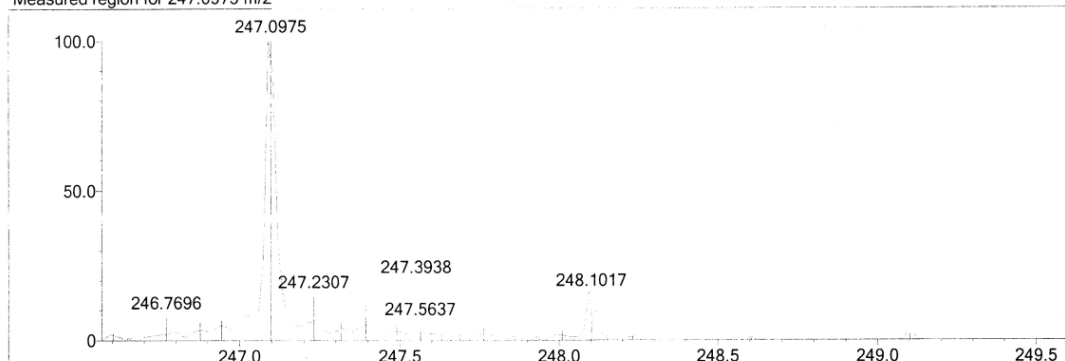

C14 H16 O4 [M-H]- : Predicted region for 247.0976 m/z

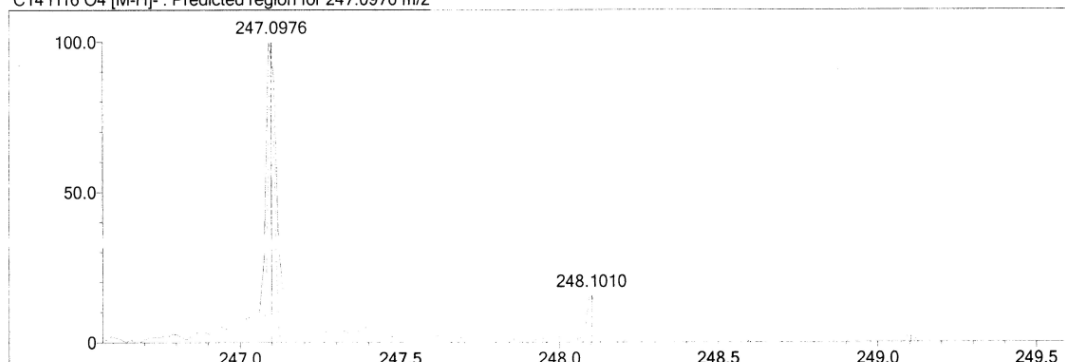

| Formula (M) | Ion    | Meas. m/z | Pred. m/z | Df. (mDa) | Df. (ppm) | DBE |
|-------------|--------|-----------|-----------|-----------|-----------|-----|
| C14 H16 O4  | [M-H]- | 247.0975  | 247.0976  | -0.1      | -0.40     | 7.0 |

Figure S22. HR-ESI-MS spectrum of compound 2.



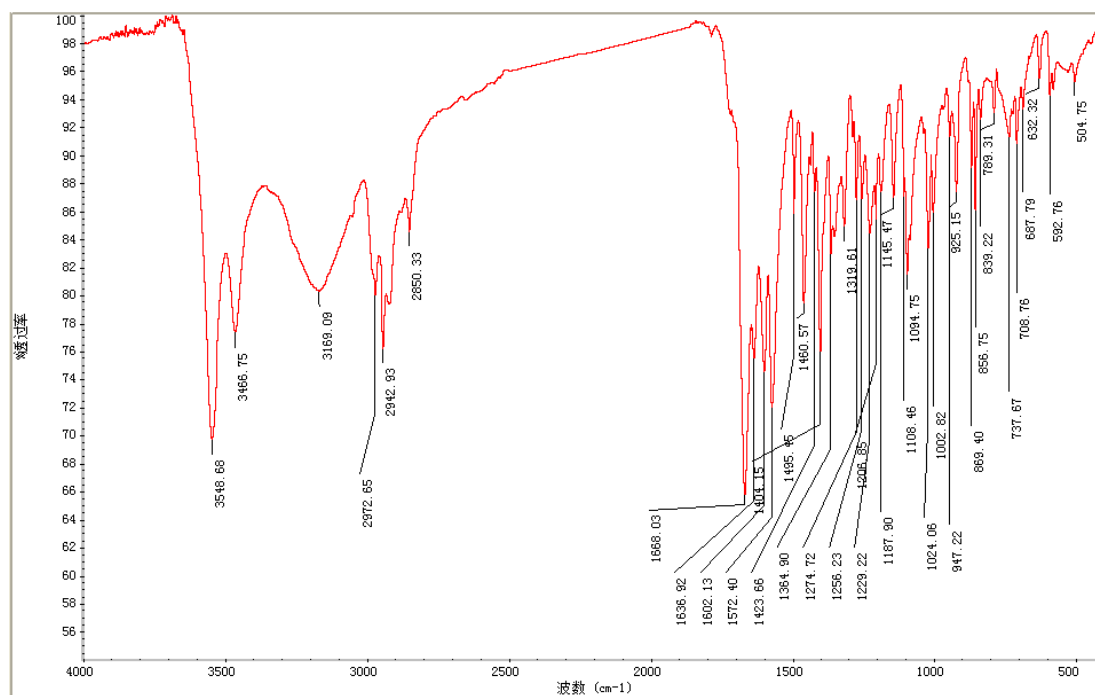

Figure S23. IR spectrum of compound 2.

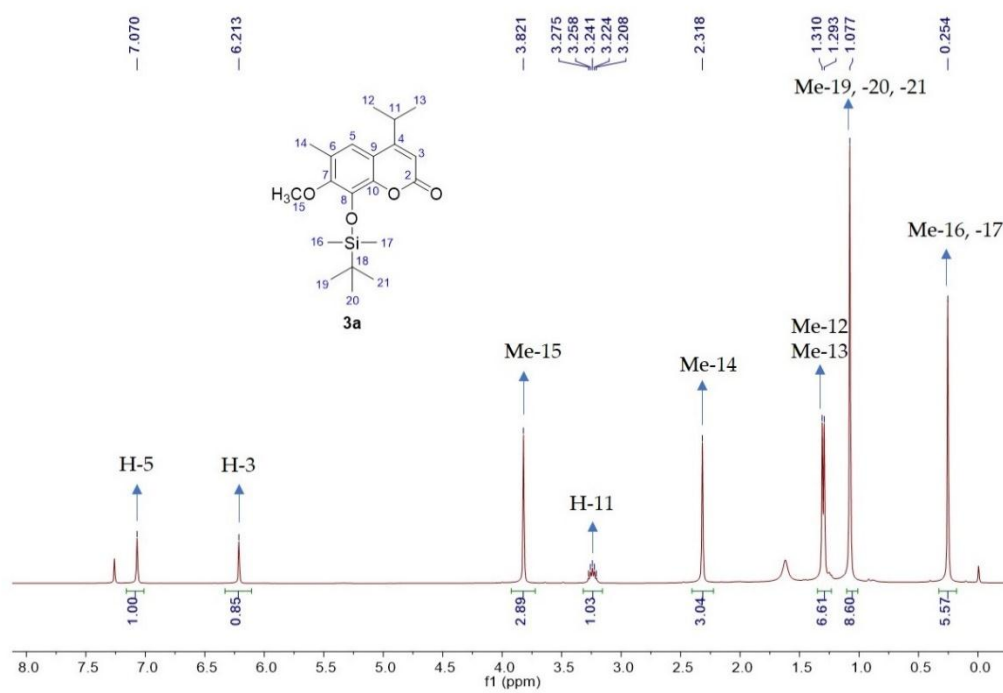

Figure S24. <sup>1</sup>H NMR spectrum of compound 3a recorded in CDCl<sub>3</sub> at 400 MHz.

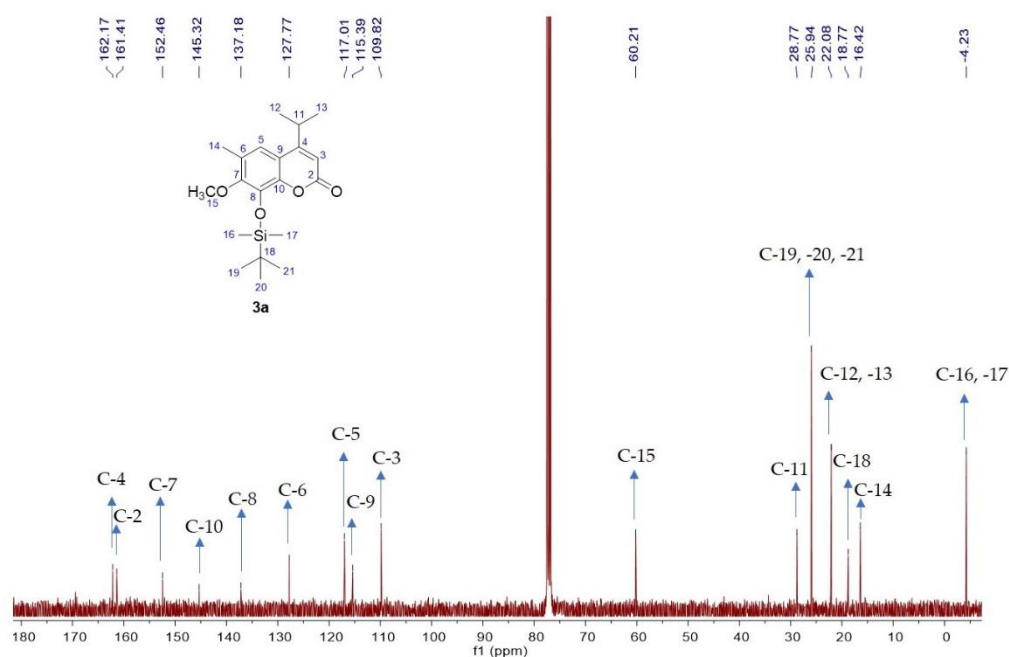

Figure S25.  $^{13}\text{C}$  NMR spectrum of compound **3a** recorded in  $\text{CDCl}_3$  at 100 MHz.

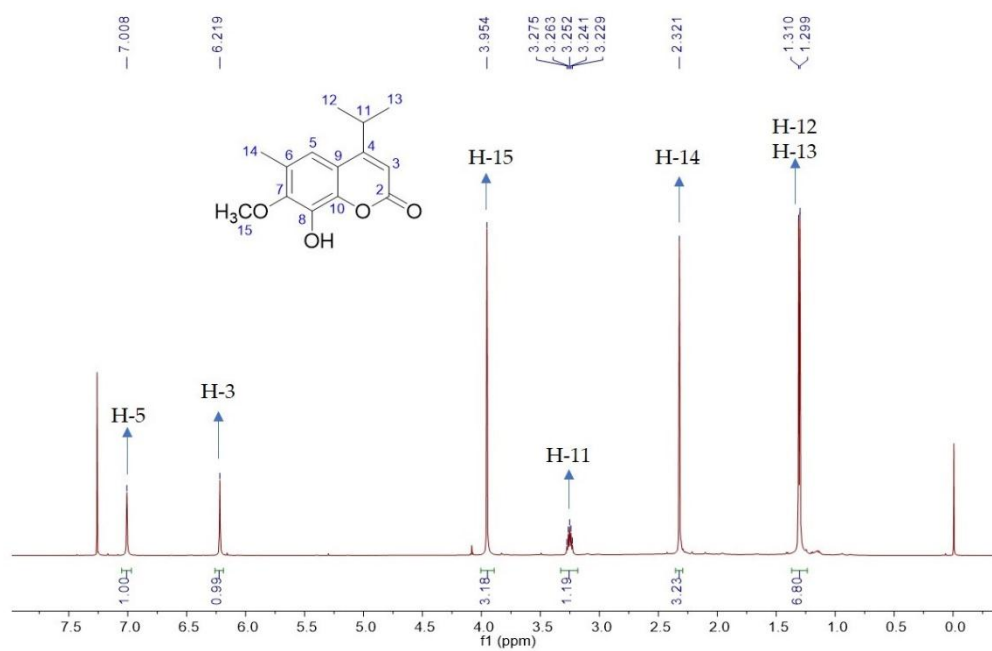

Figure S26.  $^1\text{H}$  NMR spectrum of compound **3** recorded in  $\text{CDCl}_3$  at 600 MHz.

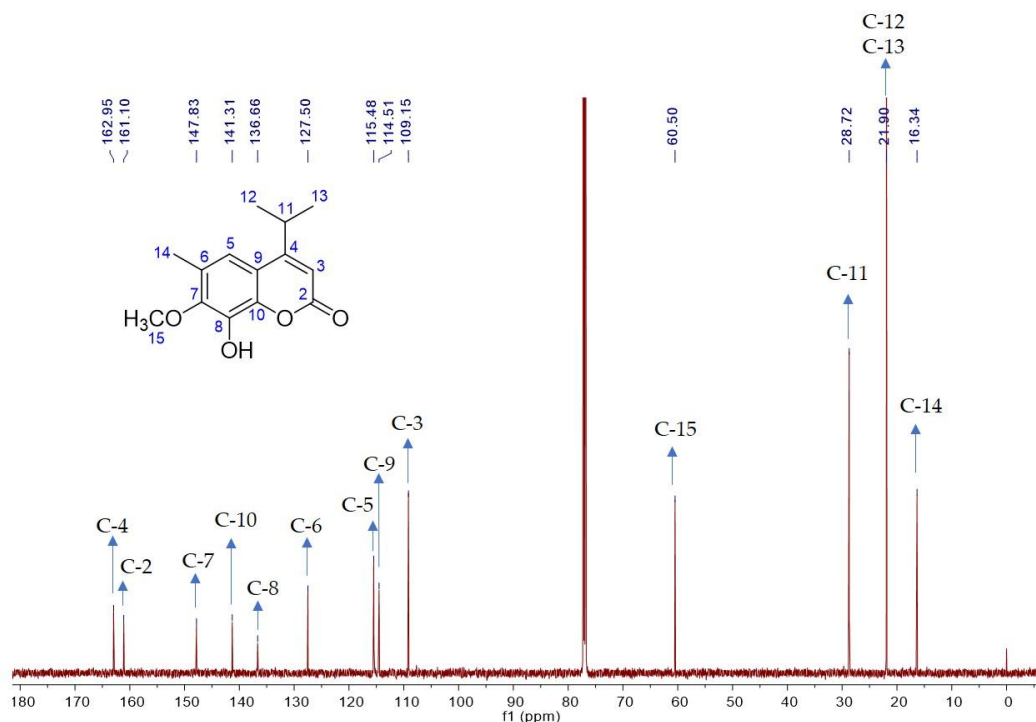

Figure S27.  $^{13}\text{C}$  NMR spectrum of compound **3** recorded in  $\text{CDCl}_3$  at 150 MHz.

$^1\text{H}$  NMR and  $^{13}\text{C}$  NMR spectral data of compounds **4-8**:

vitamin E quinone (**4**):  $^1\text{H}$  NMR (400 MHz,  $\text{CDCl}_3$ ):  $\delta_{\text{H}}$  2.54 (2H, m, H-4), 2.03 (3H, s, Me-5a), 2.00 (6H, s, Me-7a, 8a), 1.49 (4H, m, H-3, 1'), 1.23 (3H, s, Me-2a), 1.45~1.00 (19H, m, methines and methylenes), 0.86 (9H, d,  $J = 7.0$  Hz, H-4'a, 8'a, 12'a), 0.83 (3H, d,  $J = 7.0$  Hz, H-13');  $^{13}\text{C}$  NMR (100 MHz,  $\text{CDCl}_3$ ):  $\delta_{\text{C}}$  187.8 (C, C-6 or C-9), 187.4 (C, C-6 or C-9), 144.6 (C, C-10), 140.7 (C, C-5), 140.6 (C, C-8), 140.3 (C, C-7), 72.7 (C, C-2), 42.4 ( $\text{CH}_2$ , C-1'), 40.4 ( $\text{CH}_2$ , C-3), 39.5 ( $\text{CH}_2$ , C-11'), 37.8 ( $\text{CH}_2$ , C-3'), 37.6  $\times 2$  ( $\text{CH}_2$ , C-7', 5'), 37.4 ( $\text{CH}_2$ , C-9'), 32.94 (CH, C-8'), 32.91 (CH, C-4'), 28.1 (CH, C-12'), 26.7 ( $\text{CH}_3$ , Me-2a), 24.9 ( $\text{CH}_2$ , C-10'), 24.6 ( $\text{CH}_2$ , C-6'), 22.9 ( $\text{CH}_3$ , Me-12'a), 22.4 ( $\text{CH}_3$ , Me-13'), 21.6 ( $\text{CH}_2$ , C-2'), 21.5 ( $\text{CH}_2$ , C-4), 19.89 ( $\text{CH}_3$ , Me-4'a), 19.85 ( $\text{CH}_3$ , Me-8'a), 12.5 ( $\text{CH}_3$ , Me-8a), 12.4 ( $\text{CH}_3$ , Me-7a), 12.1 ( $\text{CH}_3$ , Me-5a).

albicanol (**5**):  $^1\text{H}$  NMR (400 MHz,  $\text{CDCl}_3$ ):  $\delta_{\text{H}}$  4.94 (1H, br s, H-12a), 4.64 (1H, br s, H-12b), 3.79 (2H, m, H-11), 2.42 (1H, ddd,  $J = 12.9, 4.4, 2.4$  Hz, H-7a), 2.04 (1H, m, H-7b), 1.97 (1H, m, H-9), 1.34 (1H, dd,  $J = 12.9, 4.3$  Hz, H-5), 1.76 ~ 1.00 (8H, m, H-1, 2, 3, 6), 0.87 (3H, s, Me-15), 0.80 (3H, s, Me-14), 0.72 (3H, s, Me-13);  $^{13}\text{C}$  NMR (100 MHz,  $\text{CDCl}_3$ ):  $\delta_{\text{C}}$  148.0 (C, C-8), 106.4 ( $\text{CH}_2$ , C-12), 59.3 (CH, C-9), 58.9 ( $\text{CH}_2$ , C-11), 55.3 (CH, C-5), 42.1 ( $\text{CH}_2$ , C-3), 39.2 ( $\text{CH}_2$ , C-7), 39.2 (C, C-10), 38.0 ( $\text{CH}_2$ , C-1), 33.8 ( $\text{CH}_3$ , Me-14), 33.6 (C, C-4), 24.4 ( $\text{CH}_2$ , C-6), 21.9 ( $\text{CH}_3$ , Me-15), 19.4 ( $\text{CH}_2$ , C-2), 15.4 ( $\text{CH}_3$ , Me-13).

2',4'-dihydroxy-6'-methoxy-3',5'-dimethylchalcone (**6**):  $^1\text{H}$  NMR (400 MHz,  $\text{CDCl}_3$ ):  $\delta_{\text{H}}$  13.59

(1H, s, OH-6), 5.48 (1H, br s, OH-4), 3.72 (3H, s, OMe-2), 2.69 (3H, s, 1-COCH<sub>3</sub>), 2.13 (3H, s, 3-Me or 5-Me), 2.09 (3H, s, 3-Me or 5-Me); <sup>13</sup>C NMR (100 MHz, CDCl<sub>3</sub>): δ<sub>c</sub> 203.84 (C, 1-COCH<sub>3</sub>), 161.70 (C, C-4 or C-6), 159.39 (C, C-4 or C-6), 143.02 (C, C-2), 109.08 (C, C-3), 108.64 (C, C-5), 106.55 (C, C-1), 61.86 (CH<sub>3</sub>, OMe-2), 31.39 (CH<sub>3</sub>, 1-COCH<sub>3</sub>), 8.76 (CH<sub>3</sub>, 3-Me or 5-Me), 7.61 (CH<sub>3</sub>, 3-Me or 5-Me); negative ESI-MS: *m/z* 209 [M-H]<sup>-</sup>, *m/z* 419 [2M-H]<sup>-</sup>.

norflavesone (7): <sup>1</sup>H NMR (400 MHz, CDCl<sub>3</sub>): δ<sub>H</sub> 3.94 (1H, m, H-8), 1.88 (3H, s, Me-13), 1.38 (6H, s, Me-11, 12), 1.12 (6H, d, *J* = 6.6 Hz, Me-9, 10); <sup>13</sup>C NMR (100 MHz, CDCl<sub>3</sub>): δ<sub>c</sub> 208.3 (C, C-7), 197.1 (C, C-1), 190.0 (C, C-5), 173.3 (C, C-3), 104.8 (C, C-6), 103.1 (C, C-4), 35.7 (CH, C-8), 24.7 × 2 (CH<sub>3</sub>, C-11, 12), 19.1 × 2 (CH<sub>3</sub>, C-9, 10), 7.0 (CH<sub>3</sub>, C-13); ESI-MS: *m/z* 237[M - H]<sup>-</sup>.

aspidinol (8): <sup>1</sup>H NMR (600 MHz, CDCl<sub>3</sub>): δ<sub>H</sub> 5.95 (1H, s, H-5), 3.82 (3H, s, MeO-4), 3.06 (2H, t, *J* = 7.4 Hz, H-2'), 2.01 (3H, s, Me-3), 1.72 (2H, m, H-3'), 0.99 (3H, *J* = 7.4 Hz, H-4'); ; <sup>13</sup>C NMR (150 MHz, CDCl<sub>3</sub>): δ<sub>c</sub> 206.3 (C-1'), 163.2 (C-2), 160.9 (C-4), 159.8 (C-6), 104.8 (C-3), 103.2 (C-1), 91.6 (C-5), 55.8 (MeO-4), 46.3 (C-2'), 18.3 (C-3'), 14.2 (Me-4'), 7.3 (Me-3). ESI-MS: *m/z* 223 [M - H]<sup>-</sup>.
